1

2 **Moderate episodic prenatal alcohol does not impact female offspring**  
3 **fertility in rats**

4

5 **Elizabeth K McReight<sup>1</sup>, Seng H Liew<sup>2</sup>, Sarah E Steane<sup>1</sup>, Karla J Hutt<sup>2</sup>, Karen M**  
6 **Moritz<sup>1,3</sup>, Lisa K Akison<sup>1,3</sup>**

7

8 <sup>1</sup>School of Biomedical Sciences, The University of Queensland, St Lucia, QLD, Australia.

9 <sup>2</sup>Ovarian Biology Laboratory, Department of Anatomy and Developmental Biology,

10 Biomedicine Discovery Institute, Monash University, Clayton, VIC, Australia.

11 <sup>3</sup>Child Health Research Centre, The University of Queensland, South Brisbane, QLD,  
12 Australia.

13

14 ***Corresponding Author: Lisa K Akison***

15 ***Address:*** Child Health Research Centre, The University of Queensland, Room 408, Centre  
16 for Children's Health Research (CCHR), 62 Graham St, South Brisbane, QLD 4101,  
17 AUSTRALIA

18 ***Phone:*** +61 7 3069 7511

19 ***Email:*** [l.akison@uq.edu.au](mailto:l.akison@uq.edu.au)

20

21 ***Short title:*** Prenatal alcohol & female offspring fertility

22 ***Key words:*** prenatal alcohol exposure, developmental origins of health and disease, ovarian  
23 reserve, primordial follicles, puberty onset, stereology, estrous cycles

24 ***Word count:*** 5400

25 **Abstract**

26 Prenatal alcohol exposure (PAE) has been associated with reproductive dysfunction in  
27 offspring. However, studies in females, particularly examining long-term infertility or  
28 impacts on ovarian reserve, are lacking. The current study utilised a moderate, episodic  
29 exposure model in rats to mimic ‘special occasion’ drinking, which is reported to be common  
30 during pregnancy. Our objective was to examine the consequences of this prenatal alcohol  
31 exposure on reproductive parameters in female offspring. Pregnant Sprague Dawley rats were  
32 treated with either an ethanol gavage (1g EtOH/kg body weight), or an equivalent volume of  
33 saline, on embryonic days 13.5 and 14.5 of pregnancy, resulting in a peak blood alcohol  
34 concentration of ~0.04%. Neonatal female offspring were examined for molecular markers  
35 regulating early follicle numbers in the ovary and unbiased stereology used to quantify  
36 primordial and early growing follicle numbers. Puberty onset (age at vaginal opening and  
37 first estrous) was measured post-weaning and estrous cycles, reproductive hormones  
38 (progesterone and estradiol) and pregnancy success measured in adults (5-6 months of age).  
39 We found no evidence that any of these reproductive parameters were significantly altered by  
40 PAE in this model. This animal study provides some reassurance for women who may have  
41 consumed a small amount of alcohol during their pregnancy. However, previously published  
42 effects on offspring metabolism using this model reinforce avoidance of alcohol during  
43 pregnancy.

44

45

46 **Introduction**

47 Women are increasingly deferring childbirth until later in life (Alviggi, et al. 2009), but  
48 despite recent advances in assisted reproductive technologies, there are no strategies to  
49 address declining fertility with age. Unlike men, women are born with their lifetime supply of  
50 gametes that are established before birth (Zuckerman 1951). These are contained within non-  
51 growing primordial follicles, defined as the ovarian reserve (Findlay, et al. 2015b), and  
52 declines exponentially with age as the pool of oocytes are depleted by ovulation or, more  
53 commonly, by atresia (Finch 2014). However, the number initially established varies widely  
54 between individuals, with a 70-fold range predicted at birth corresponding with a predicted  
55 age range at menopause of ~38-60 years (Wallace and Kelsey 2010). The putative molecular  
56 factors involved in the establishment and maintenance of the ovarian reserve are just  
57 beginning to be elucidated (Findlay, et al. 2015a, Kelsey, et al. 2012, Pangas 2012), with a  
58 balance between factors involved in follicle quiescence, activation or apoptosis integral to  
59 ensuring the longevity of the reproductive lifespan (Reddy, et al. 2010).

60 Importantly, environmental and nutritional exposures during the prenatal establishment of  
61 ovarian reserve have been identified as critical determinants for the length of the female  
62 reproductive lifespan and subsequent fertility, especially later in life (Richardson, et al.  
63 2014). For example, animal models show that maternal exposure to endocrine disrupting  
64 chemicals such as the plasticiser bisphenol-A (BPA) (Hunt, et al. 2012), cigarette smoking  
65 (Camlin, et al. 2016) and malnutrition (Bernal, et al. 2010, Mossa, et al. 2013, Winship, et al.  
66 2018) can all impact on the endocrine and nutritional milieu during pregnancy, resulting in  
67 reduced follicle numbers. However, a common maternal insult that has not received as much  
68 attention is prenatal alcohol exposure (PAE). Most health authorities advise abstinence from  
69 alcohol consumption while pregnant or planning a pregnancy (National Health and Medical  
70 Research Council 2009, World Health Organisation 2004). Despite this, recent reports

71 suggest that women are consuming alcohol both prior to pregnancy recognition (Ishitsuka, et  
72 al. 2019, McCormack, et al. 2017, Muggli, et al. 2016) and late in pregnancy (Muggli, et al.  
73 2016, Umer, et al. 2020), with rates as high as 50-60% in these studies and ~10% globally  
74 (Popova, et al. 2017).

75 Although the neurological and behavioural deficits in offspring arising from PAE are well  
76 known, emerging evidence suggests that a much broader range of body systems can be  
77 affected. This includes the reproductive system, with a recent systematic review identifying  
78 deficits in males and females from both clinical and preclinical studies (Akison, et al. 2019).  
79 However, this review identified a general paucity of studies examining the female  
80 reproductive system (3 clinical and 12 preclinical), with almost all studies focussing on age at  
81 first menarche/puberty onset, which was significantly delayed in PAE offspring compared to  
82 controls in most studies (Boggan, et al. 1979, Esquifino, et al. 1986, McGivern, et al. 1992,  
83 McGivern and Yellon 1992, Robe, et al. 1979). Importantly, no studies to-date have  
84 examined impacts of PAE on ovarian reserve or long-term fertility. There are a few studies  
85 reporting direct effects of alcohol consumption on ovarian reserve, with one study reporting  
86 heavy binge drinking impacted on plasma AMH levels, a proxy measure for ovarian reserve,  
87 in a group of African American women (Hawkins Bressler, et al. 2016), and evidence of  
88 earlier age at menopause in women with alcohol use disorder (Choi, et al. 2017, Gavalier  
89 1985).

90 Other direct effects of alcohol on the female endocrine system have been reported  
91 (Rachdaoui and Sarkar 2017), resulting in irregular menstrual/estrous cycles, anovulation,  
92 early menopause and elevated estradiol (E2) levels in both women and rodents. High alcohol  
93 consumption has also been suggested to negatively impact on assisted reproductive outcomes,  
94 with reduced oocytes retrieved, lower rates of pregnancy and increased risk for miscarriage  
95 (see Van Heertum and Rossi (2017) for review).

96 Previous studies of PAE on female reproductive outcomes in offspring have typically been  
97 conducted in women with very high levels of alcohol use (clinical) or using chronic, high  
98 doses (preclinical) (see Akison, et al. (2019) for review). However, this is not representative  
99 of typical reported drinking behaviours in pregnant women, which are often episodic and at  
100 low-moderate levels of alcohol, referred to as ‘special occasion’ drinking (McCormack, et al.  
101 2017, Muggli, et al. 2016). This study, using a rat model of acute, low-level exposure that has  
102 been previously reported to result in a blood alcohol concentration (BAC) of ~0.05%, did not  
103 result in fetal growth restriction but still produced sex-specific adverse metabolic outcomes in  
104 adult offspring (Nguyen, et al. 2019). The timing of exposure corresponded with germ cell  
105 cyst or ‘nest’ formation in the ovaries of female offspring, with breakdown of these nests and  
106 encapsulation of individual oocytes by somatic cells to form primordial follicles occurring in  
107 late gestation and peaking in early postnatal life in rodents (Sarraj and Drummond 2012).  
108 Our objective was to examine the impact of this PAE model on the establishment of offspring  
109 ovarian reserve and subsequent impacts on puberty onset in adolescence and fertility  
110 parameters in adulthood. We hypothesised that PAE would reduce the ovarian reserve in  
111 neonates, delay puberty onset, disrupt estrous cycling in adults and reduce fertility in adult  
112 female offspring.

113

## 114 **Materials and methods**

### 115 *Animal model*

116 Ethics approval for all animal experimentation was obtained from the University of  
117 Queensland Anatomical Biosciences Animal Ethics Committee  
118 (SBMS/AIBN/521/15/NHMRC) prior to commencement of the study and was conducted in  
119 accordance with the Australian Code for the Care and Use of Animals for Scientific Purposes

120 (2013, 8th Edition). Reporting of animal experiments conforms to the ARRIVE guidelines  
121 (Kilkenny and Altman 2010, Kilkenny, et al. 2010).

122 A detailed description of the source of animals, housing conditions and treatments has been  
123 previously reported (Nguyen, et al. 2019). Briefly, outbred, nulliparous Sprague-Dawley rats  
124 were housed in a temperature- and humidity-controlled environment with an artificial 12 h  
125 reversed light-dark cycle and provided with standard laboratory rat chow (Rat & Mouse  
126 Meat-Free Diet, Specialty Feeds, Glen Forrest WA, Australia) and water ad libitum. After an  
127 initial acclimation period, dams were mated with a proven stud male (1200-1700) and  
128 pregnancy confirmed via presence of a seminal plug. The following morning was designated  
129 as embryonic day (E) 0.5. Once pregnant, dams were randomly allocated to either receive  
130 ethanol (EtOH) or saline (Control) via oral gavage at E13.5 and E14.5. EtOH treated females  
131 ( $n = 16$ ) received 18% v/v EtOH in saline solution (0.9% NaCl) at a dose of 1 g/kg body  
132 weight, while Control females ( $n = 14$ ) received an equivalent volume of saline. Water and  
133 chow consumption were measured daily from E12.5 (one day prior to first gavage) and  
134 weight gain monitored throughout pregnancy. Day of birth was designated postnatal day (PN)  
135 0. Dams and offspring were allocated either to neonatal or adolescent/adult studies of  
136 reproductive parameters. Figure 1 provides a flow chart showing the dams allocated to each  
137 arm of the study and the number of offspring that contribute to each analysis at each age.  
138 Only 1-2 females were used from each litter for each experiment to remove potential litter  
139 effects, as recommended for DOHaD studies by Dickinson, et al. (2016). The exception was  
140 monitoring puberty onset, where litter averages were obtained across 5-7 offspring per litter.

141

#### 142 ***Blood and tissue collection***

143 Approximately 150  $\mu$ l whole blood was collected from pregnant dams via a tail tip bleed at 1  
144 h and 5 h post gavage on E13.5 and 14.5 to measure blood alcohol concentration (BAC)

145 (Nguyen, et al. 2019). An additional tail tip bleed at E19.5 was used to measure plasma  
146 progesterone levels. Female offspring from neonatal cohort litters were collected at PN3 and  
147 PN10 (1 – 2 per litter per time point), weighed, culled via decapitation and ovaries collected  
148 via microdissection. Ovaries were either snap frozen using liquid nitrogen and stored at -  
149 80°C for molecular analysis or fixed in 4% paraformaldehyde (PFA) for histological analysis.  
150 At 6 months of age, two female offspring from adult cohort litters were culled via carbon  
151 dioxide asphyxiation at proestrous. Whole blood was collected into EDTA tubes via cardiac  
152 puncture for hormone analysis (estradiol). An additional female from each litter was used for  
153 mating experiments as described below and whole blood collected via cardiac puncture at day  
154 9.5-11.5 of pregnancy for hormone analysis (progesterone). All blood samples were  
155 immediately centrifuged at 4000 rpm for 10 min at 4°C and plasma separated, aliquoted and  
156 stored at -20°C until subsequent analysis.

157

#### 158 ***Measurement of blood alcohol concentration (BAC) and steroid hormones***

159 Plasma BAC was determined by Pathology Queensland (Queensland Health) using an  
160 alcohol dehydrogenase enzymatic assay (Beckman Coulter, Lane Cove, NSW, Australia;  
161 reference #474947) as previously reported (Nguyen, et al. 2019). Steroid hormones were  
162 analysed by radioimmunoassay (RIA) as previously described (Kalisch-Smith, et al. 2019).  
163 Briefly, plasma estradiol was analysed by ultra-sensitive RIA (Beckman Coulter; reference #  
164 DSL-4800), with a limit of detection of 22.4 pmol/L and intra-assay coefficient of variation  
165 (CV) of 1.6%. Plasma progesterone was analysed using an RIA developed in-house and  
166 progesterone antiserum C-9817 (Bioquest, North Ryde, NSW, Australia), with a limit of  
167 detection of 0.32 nmol/L and an intra-assay CV of 2.7%.

168

#### 169 ***Assessment of puberty onset and first estrous in adolescent offspring***

170 From PN30, female offspring were monitored for puberty onset, characterised by the  
171 complete loss of the vaginal membrane, as previously described (McGivern and Yellon  
172 1992). Following puberty onset, each animal was monitored daily using a mouse-sized  
173 vaginal impedance probe and the EC40 estrous cycle monitor (Fine Science Tools) to detect  
174 electrical impedance  $>4.0$  k $\Omega$ , indicating the first pro-estrous.

175

### 176 ***Estrous cycle tracking and fertility assessments in adult offspring***

177 At six months of age, one female from each litter had their estrous cycles monitored daily  
178 using the EC40 estrous cycle monitor (Fine Science Tools) as described above for 21 days.  
179 Following this monitoring period, the same animals were mated at pro-estrous with a proven  
180 stud male (1200-1700) and pregnancy confirmed via presence of a seminal plug. The  
181 following morning was designated as embryonic day (E) 0.5. Once pregnant, dams were  
182 housed singly. At E9.5-11.5, pregnant offspring were culled by CO<sub>2</sub> asphyxiation, cardiac  
183 blood was collected into EDTA tubes for future hormone analysis and the uterus was  
184 removed. Implantation and reabsorption sites were counted as a measure of fertility.  
185 Implantations rather than live birth rate was used to assess fertility to minimise animal  
186 wastage, although we acknowledge that potential losses in late pregnancy may have been  
187 missed using this method.

188

### 189 ***RNA extraction and quantitative PCR (qPCR)***

190 RNA was extracted from frozen neonatal ovarian tissue (both ovaries from 1-2 animals per  
191 litter,  $n = 10-12$  per time-point per group; see Supplemental Table 1 for more details) using  
192 either: PN3 ovaries - QIAzol Lysis Reagent (Qiagen, Chadstone, VIC, Australia) and  
193 Glycoblue coprecipitant (Thermo Fischer Scientific, Richlands, QLD, Australia) to assist  
194 with pellet visualisation as per the manufacturer's instructions, with an additional overnight



195 precipitation at -20°C; or PN10 ovaries - QIAGEN RNeasy Minikit (Qiagen) according to the  
196 manufacturer's instructions. All ovaries were initially homogenised using a 20 gauge needle  
197 and 1 mL syringe to assist with lysis. RNA concentration was quantified using a Nanodrop  
198 2000 spectrophotometer (Thermo Fischer Scientific) and yields were typically  $\geq 25$  ng/ $\mu$ L and  
199  $\geq 130$  ng/ $\mu$ L of total RNA for PN3 and PN10 ovaries respectively. The 260/280 ratio for all  
200 samples was  $\cong 2.0$ . cDNA synthesis was performed using the iScript Reverse Transcription  
201 (RT) Supermix (Bio-Rad Laboratories, Gladesville, NSW, Australia), according to the  
202 manufacturer's instructions. Each reaction contained 200 ng of RNA, reverse transcribed to  
203 produce 20 ng/ $\mu$ L cDNA. RT reactions were performed on a PCR Express Thermal Cycler  
204 (Thermo Fisher Scientific). Samples were then diluted 1:10 for a working concentration of 2  
205 ng/ $\mu$ L and stored at -20°C.

206 Expression of genes involved in regulation of primordial follicle numbers were analysed  
207 using real-time quantitative polymerase chain reaction (qPCR) (see Table 1 for details of  
208 specific genes). qPCR reactions were performed in duplicate on an Applied Biosystems  
209 Quantstudio 6 Flex Real-Time PCR System (ThermoFisher Scientific) using 4 ng cDNA, Taq  
210 PCR Master Mix (Qiagen; catalogue #201443) and Taqman Assay-on-Demand primer/probe  
211 sets (Thermo Fischer Scientific; see Table 1 for details) per 10  $\mu$ L reaction. Relative gene  
212 expression was determined using the comparative threshold method ( $\Delta\Delta$ CT) and normalised  
213 to the mean of *Hprt* run in duplicate as the endogenous control. Only one endogenous control  
214 gene was found to be stably expressed across all samples, regardless of experimental group,  
215 from a previous pilot study of 10 commonly used endogenous control genes in similar  
216 neonatal ovary samples exposed to prenatal alcohol (data not shown; see footnote to Table 1  
217 for other genes tested). Fold-change was expressed relative to the average of the saline  
218 control group at each age.

219

220 ***Ovarian histology and stereology***

221 Ovarian follicle counts were performed on ovaries collected from neonatal offspring at PN3  
222 and PN10 using unbiased stereology, considered the ‘gold standard’ for quantification of  
223 cells in tissue sections (Geuna and Herrera-Rincon 2015). One ovary from each neonate (1-2  
224 animals per litter,  $n = 8-10$  per time-point per group; see Supplemental Table 1 for more  
225 details) was fixed in 4% PFA, processed manually via increasing concentrations of EtOH and  
226 xylene, and embedded in paraffin wax. Ovaries were serially sectioned at  $5\mu\text{m}$  and every 9<sup>th</sup>  
227 section stained with Period Acid Schiff (PAS) and counterstained with haematoxylin.  
228 Primordial, transitional and primary follicles were classified as previously described (Myers,  
229 et al. 2004). Briefly, single oocytes surrounded by a complete or incomplete layer of  
230 squamous granulosa cells were considered non-growing, primordial follicles (i.e. the ovarian  
231 reserve); single oocytes surrounded by a single layer of cuboidal granulosa cells were  
232 considered primary follicles; and a mixture of squamous and cuboidal granulosa cells were  
233 considered transitional follicles. Where oocytes were still clustered together in an ovarian  
234 cyst or ‘nest’ prior to follicle formation (at PN3 only), these were counted separately.  
235 The optical disector/fractionator method was used to quantify primordial, transitional and  
236 primary follicles as previously described (Myers, et al. 2004, Stringer, et al. 2019). All counts  
237 were performed blinded to treatment/control. Briefly, every ninth section (i.e.  $f_1 = \text{sampling}$   
238  $\text{fraction} = 1/9$ ) was examined on a Nikon Upright Stereology and Slide Scanning microscope  
239 (SciTech Pty Ltd, Preston, VIC, Australia) with motorised stage at 40X magnification using  
240 the Stereo Investigator stereology system (Version 2018, MBF Bioscience, Williston, VT,  
241 USA). Using the Stereo Investigator software, a sampling grid (grid size  $200\mu\text{m} \times 200\mu\text{m} =$   
242  $40,000\mu\text{m}^2$ ) was overlaid over the section, with a  $95\mu\text{m} \times 95\mu\text{m}$  ( $9025\mu\text{m}^2$ ) counting  
243 frame overlaid in each sampling grid square ( $f_2 = 9025/40,000$ ). Each counting frame  
244 consisted of inclusion and exclusion boundaries, with oocytes exhibiting clearly defined

245 nuclei, within the counting frame or on the inclusion boundary, counted to provide raw  
246 counts of each follicle type (Q-). As thin sections were used, the entire 5  $\mu\text{m}$  was counted ( $f_3$   
247 = 5/5). To estimate the total number of each follicle type per ovary (N), the following  
248 equation was used:  $N = Q_{\text{(follicle)}} \times (1/f_1) \times (1/f_2) \times (1/f_3)$ .  
249 Total secondary and antral follicle numbers were estimated per ovary by counting follicles  
250 with a clearly defined nuclei within the oocyte in every 36<sup>th</sup> section at 10X magnification.  
251 Growing follicles were classified as previously described (Myers, et al. 2004). Briefly,  
252 secondary follicles were characterised by more than one layer of cuboidal granulosa cells  
253 surrounding the oocyte without any visible antral spaces. Antral follicles were defined by a  
254 clear antral space. Atretic follicles could not be quantified due to the difficulty of identifying  
255 apoptotic cells in paraffin sections. Raw counts were multiplied by the sampling interval (i.e.  
256 36) to obtain total counts per ovary.

257

### 258 *Statistical analyses*

259 All raw data for each analysis are provided in Supplemental Table 1. Analyses were  
260 conducted using GraphPad Prism 7.0 (GraphPad Software, San Diego, CA, USA) and data  
261 presented as mean  $\pm$  SEM. Prior to hypothesis testing, data were tested for a normal  
262 distribution using the D'Agostino-Pearson test. Control and EtOH-exposed groups were  
263 compared for each parameter using a Student's t-test (parametric data) or a Mann-Whitney  
264 U-test (non-parametric data). Where there was a significant difference in the standard  
265 deviations between groups, a Student's t-test with Welch's correction was conducted. Fishers  
266 exact test was used to compare the cumulative percentage of offspring in each group reaching  
267 puberty or estrous at each age. Significance level was  $P < 0.05$  for all statistical tests, with a  
268 Bonferroni correction for multiple testing applied to analysis of gene expression (12 genes =  
269  $0.05/12 = 0.004$ ).

270

## 271 **Results**

### 272 *Maternal parameters and postnatal growth*

273 Data from dams used to produce offspring for the adolescent/adult arm of the study have  
274 been previously reported (Nguyen, et al. 2019). However, these animals were also included in  
275 the summary of maternal parameters for completeness. All dams were of similar weight at  
276 mating and at time of gavage and pregnancy weight gain was similar across both groups pre-  
277 and post-gavage (Table 2). Water and chow consumption was also not affected by treatment  
278 (Table 2). Note that Nguyen, et al. (2019) also reported that for dams specifically used to  
279 produce offspring for the adolescent/adult arm of the study, there were no significant  
280 differences in blood glucose or energy intake post-gavage. There were also no differences in  
281 pregnancy outcomes between EtOH and Control dams, including litter sex ratio, litter size  
282 and plasma progesterone levels measured in late gestation (Table 2). Nguyen, et al. (2019)  
283 also reported that for dams specifically used to produce offspring for the adolescent/adult arm  
284 of the study, there were no significant differences in the number of implantation scars,  
285 suggesting no differences in potential late pregnancy loss prior to birth. Note that one dam in  
286 the EtOH group had a litter of only 7 pups due to a suspected blockage in one uterine horn  
287 (no implantation scars were observed) and so this litter was excluded from subsequent  
288 analyses (both here and in Nguyen, et al. (2019)). BAC was measured in 6 out of 14 Control  
289 dams, with BAC below the limit of detection at each time point. In EtOH-treated dams, mean  
290 BAC was ~42 mg/dL (~0.04%) at 1 h following gavage at E13.5 and E14.5, but by 5 h post-  
291 gavage, was below the limit of detection on both days (Table 2).

292 There was no difference in neonatal pup offspring weights at ovary collection on PN3 and  
293 PN10 between EtOH and Control groups (Table 3). There were also no differences in weights  
294 of adolescent offspring at PN28, one week post-weaning and just prior to monitoring for

295 puberty onset from PN30 (Table 3). Adult offspring at 6 months of age were all of similar  
296 weight across EtOH and Control groups before measurement of reproductive parameters at  
297 this age (Table 3). Nguyen, et al. (2019) reported no difference in pup weight just after birth  
298 (PN1) for offspring used in the adolescent/adult arm of the study and no differences in weight  
299 gain up to 6 months of age.

300

### 301 ***Expression of factors potentially regulating follicle numbers in neonatal ovaries***

302 PAE did not significantly impact the expression of a number of genes known to regulate  
303 primordial follicle numbers via the apoptotic pathway (*Bax*, *Bak1*, *Bcl2*, *Bcl2l1*, *Bcl2l1l*,  
304 *Puma/Bbc3*), or positive and negative regulators of follicle growth and recruitment (*Inha*,  
305 *Amh*, *Stk11/Lkb1*, *Cxcl12*, *Pten*) at PN3 (Table 4) or PN10 (Table 5). At PN3, there was a  
306 trend for reduced expression of *Cxcr4*, involved in follicle growth, but this was at  $P = 0.04$ ,  
307 which was not below the 0.004 threshold when adjusting for multiple testing.

308

### 309 ***Ovarian reserve and follicle counts in neonatal ovaries***

310 PAE did not impact the number of oocytes still clustered in ovarian ‘nests’ at PN3 (Figure  
311 2A) or the number of fully-formed primordial follicles (ovarian reserve) at PN3 or PN10  
312 (Figure 2B). At PN3, the majority (~95%) of follicles within the ovary were primordial  
313 follicles, with ~4% transitioning from primordial to primary and only 1% were primary  
314 follicles (Figure 2C). However, by PN10, the contribution of primordial follicles to the total  
315 follicle count within the ovary had dropped to ~68%, with transitional (~10%), primary  
316 (~12%), secondary (~9%) and even a small number of early antral (~1%) follicles  
317 contributing to the total follicle pool (Figure 2D). There were no differences in the number of  
318 growing follicles at any stage in the ovaries from EtOH or Control neonatal offspring at PN3  
319 or PN10 (Figure 2C-D).

320

321 ***Puberty onset and estrous cycles in adolescent offspring***

322 PAE did not impact the timing of puberty onset in female offspring, with both the Control  
323 and EtOH groups experiencing puberty onset at an average age of PN38 (Figure 3A). The  
324 cumulative percentage of offspring achieving puberty with increasing age was similar in both  
325 groups, with all animals reaching puberty by PN45-47 (Figure 3B). Similarly, PAE did not  
326 impact the age of first estrous in female offspring, with both groups experiencing their first  
327 pro-estrous as measured by vaginal electrical impedance at an average age of PN45 (Figure  
328 3C). The cumulative percentage of offspring achieving first estrous with increasing age was  
329 also similar in both groups, with all animals reaching this reproductive milestone by PN56-61  
330 (Figure 3D).

331

332 ***Fertility parameters in adult offspring***

333 PAE did not impact estrous cycle regularity in adult offspring. A typical 4-day cycle, as  
334 shown by the peaks in vaginal electrical impedance, is shown in Figure 4A. The number of  
335 estrous cycles across the 21-day monitoring period (Figure 4B) and the estrous cycle length  
336 (Figure 4C) did not differ between the Control and EtOH-exposed offspring. Plasma estradiol  
337 levels in pro-estrous animals also did not differ (Figure 4D).

338 Following mating with a proven stud male at pro-estrous, all animals became pregnant within  
339 5h post-mating, as shown by the presence of a seminal plug. Implantation rates at E9-11 were  
340 similar between the two groups, with dissected uteri containing an average of 15 implantation  
341 sites (Figure 4E). PAE also did not impact the fetal resorption rate, with uteri of both Control  
342 and EtOH offspring containing an average of 2 resorption sites (data not shown). Plasma  
343 progesterone levels at this stage of pregnancy were also not different between groups (Figure  
344 4F).

345

346 **Discussion**

347 While consumption of alcohol in women has been linked to reduced ovarian reserve and  
348 impaired reproductive success, the effect of PAE on these reproductive outcomes in female  
349 offspring is unknown. To our knowledge, this is the first study to conduct a comprehensive  
350 investigation of reproductive parameters across the life course in female offspring following a  
351 relatively modest, acute dose of alcohol during pregnancy. Our results suggest that this model  
352 is not detrimental to the follicle pool established immediately after birth, does not change the  
353 age of puberty onset and the initiation of estrous, and does not affect estrous cycles and  
354 fertility in adult female offspring. These results provide some reassurance for women who  
355 may have consumed a low level of alcohol during pregnancy.

356 Previous preclinical studies investigating potential effects of PAE on female reproductive  
357 outcomes in offspring have typically used high doses of alcohol (35-36% EtOH-derived  
358 calories) in a Lieber-deCarli style liquid diet (see Akison, et al. (2019) for review), resulting  
359 in BACs of ~100-150 mg/dl (0.10-0.15%) (Elton, et al. 2002). This is equivalent to 3-5  
360 standard drinks consumed in two hours by an average weight woman (Leeman, et al. 2010).  
361 We report here that the average BAC across all EtOH-treated dams was ~42 mg/dl (0.04%),  
362 slightly less than the 0.05% reported in Nguyen, et al. (2019) due to slightly lower BACs in  
363 the additional six treated dams used in this study for neonatal offspring studies. This was  
364 despite a consistent dosage, normalised to body weight, and highlights the individual  
365 variability in response to EtOH treatment and the importance of monitoring and reporting this  
366 response via BAC levels. Thus, the much lower BAC level compared to previous studies may  
367 explain the lack of a significant reproductive phenotype in PAE offspring. Given the paucity  
368 of studies examining the effect of PAE on ovarian reserve and later fertility, it remains to be  
369 seen if higher doses of alcohol can impact these reproductive parameters. Of note, examples

370 of previous preclinical studies showing significant impacts on ovarian reserve associated with  
371 maternal smoke exposure (Camlin, et al. 2016) and undernutrition (Bernal, et al. 2010,  
372 Winship, et al. 2018) used much more severe exposures, with the equivalent of 12  
373 cigarettes/75 min exposure twice daily in the former study and a 50% or greater reduction in  
374 calories or protein compared to the control intake in the latter studies.

375 The timing of exposure corresponded with an important stage in prenatal ovarian  
376 development in the rat, when germ cells cysts or ‘nests’ form, and the first wave of apoptosis  
377 occurs (Sarraj and Drummond 2012). We used an acute exposure of only two doses on two  
378 consecutive days of pregnancy, designed to mimic a low level of exposure over a weekend or  
379 on a special occasion. This is the first time that reproductive outcomes following such a short  
380 exposure have been examined, with previous preclinical studies typically treating throughout  
381 pregnancy or from mid-gestation to birth (see Akison, et al. (2019) for review). Again, this  
382 may explain the lack of a significant reproductive phenotype, and further studies are needed  
383 to determine if establishment of ovarian reserve is altered if exposure to alcohol continues  
384 through late gestation until birth, when primordial follicles are forming. Indeed, previous  
385 examples showing significant effects of maternal insults on offspring ovarian reserve were  
386 conducted throughout pregnancy and/or lactation (Bernal, et al. 2010, Camlin, et al. 2016),  
387 with one recent study finding effects of a maternal low-protein diet also including the  
388 preconception period (Winship, et al. 2018).

389 Previous preclinical studies have reported that more extensive, higher dose PAE is associated  
390 with delays in puberty onset in six out of eight studies (see Akison, et al. (2019) for review).

391 Most studies reported this as the cumulative percentage of females displaying vaginal  
392 opening over time. Two studies in different rat strains showed that 100% of controls had  
393 achieved puberty by PN40-42, while only 73% of EtOH-exposed offspring achieved this  
394 developmental milestone by this age, with some animals delayed to as late as PN46



395 (Esquifino, et al. 1986, McGivern and Yellon 1992). Aside from puberty onset, three  
396 preclinical studies, all in rats, have previously examined estrous cyclicity using vaginal  
397 cytology, with only one study reporting an increased incidence of acyclic females which  
398 emerged with increasing age (i.e. at 6 and 12 months but not at 2 months; McGivern, et al.  
399 (1995)). The other two studies examined estrous cycles at 3.5-4 months of age and found no  
400 differences (Hard, et al. 1984, Lan, et al. 2009). This suggests that PAE may shorten the  
401 reproductive lifespan, which is only apparent when examining older females. In our study, we  
402 examined estrous cycles in female offspring at 6 months of age, an age of peak reproductive  
403 capacity, and found no differences. Rats typically undergo reproductive senescence  
404 (equivalent to menopause in women) at around 12 months of age, with subfertility at around  
405 8-10 months of age (see Cruz, et al. (2017) for review). Thus, future studies examining PAE  
406 in aged animals may be of benefit. This subfertile period typically occurs in humans at 37.5-  
407 51 years of age in humans, culminating in menopause at ~51 years of age (te Velde 1998).  
408 Few studies ( $n = 4$ ) have previously examined hormone levels in female offspring following  
409 PAE (see Akison, et al. (2019) for review), with only one study in 10 week-old rats reporting  
410 increased circulating estradiol levels at pro-estrous compared to controls (Polanco, et al.  
411 2010). We found no effect of PAE on plasma estradiol at the same stage of the estrous cycle  
412 at 6 months of age, nor on plasma progesterone levels during early pregnancy. There were  
413 also no direct effects of ethanol on progesterone levels in late pregnancy in treated dams,  
414 which is contrary to reports of reduced progesterone concentrations in response to alcohol  
415 exposure, albeit in pre-menopausal, non-pregnant women (Gill 2000, Rachdaoui and Sarkar  
416 2017).  
417 We measured expression of a subset of potential factors involved in regulating primordial  
418 follicle numbers to determine if these were affected by PAE. Numbers of these non-growing  
419 follicles are controlled by a balance of factors that regulate activation and recruitment to the

420 growth phase and maintain quiescence via extrinsic (e.g. *Amh*, *Inha*) (Durlinger, et al. 2002,  
421 Myers, et al. 2009, Pangas 2012) and intrinsic (e.g. *Pten*, *Cxcr4*, *Cxcl12*, *Stk11/Lkb1*) (Holt,  
422 et al. 2006, Jiang, et al. 2016, Reddy, et al. 2008, Reddy, et al. 2010, Wear, et al. 2016)  
423 factors; and regulate depletion via pro- and anti-apoptotic factors (e.g. *Bax*, *Bak1*, *Bcl2*,  
424 *Bcl2l1*, *Bcl2l1l1*, *Puma/Bbc3*) (Flaws, et al. 2001, Hutt 2015, Liew, et al. 2014, Liew, et al.  
425 2016, Myers, et al. 2014). While many other factors are emerging as being important, we  
426 chose this subset to encompass these three major fates of primordial follicles – activation,  
427 quiescence and apoptosis. Consistent with our follicle count data, we found no significant  
428 difference in any of these factors, at least at the mRNA level, in neonatal ovaries exposed to  
429 PAE compared to controls. We chose the early (PN3) and late (PN10) neonatal periods, as  
430 these correspond with peak numbers of primordial follicles and a period of active recruitment  
431 to the growing follicle pool in the rat (Picut, et al. 2015). We did not look for any differences  
432 in ovarian reserve in young or aged adult ovaries, given no evidence for differences in the  
433 starting population of primordial follicles in neonates, no differences in molecular factors  
434 regulating follicle numbers and no differences in the number of implantations in mated  
435 adults, which is reflective of the number of ovulated follicles in that cycle.

436 Although we found no effects of PAE in this study, we emphasise that this same model did  
437 produce sex-specific metabolic effects in offspring (Nguyen, et al. 2019) ,with males at 6  
438 months of age, litter-mates of the adult females reported here, showing evidence of insulin  
439 resistance. Female offspring were also examined but showed no evidence of metabolic  
440 dysfunction. This suggests that this model of PAE can result in sex-specific programming of  
441 long-term health. Therefore, it would be interesting for future studies to examine the impact  
442 of this low-level PAE model on male reproductive parameters, especially as there is some  
443 evidence that higher doses of alcohol during pregnancy can affect testis development and  
444 long-term reproductive performance (Lan, et al. 2013, Udani, et al. 1985). Also, our previous

445 work in a model of PAE administered at a similar stage of gestation, but resulting in a higher  
446 BAC, impaired renal development and resulted in a low nephron endowment with offspring  
447 developing hypertension and renal dysfunction (Gray, et al. 2010). This suggests alcohol  
448 consumption at this stage of gestation can cause significant long-term health problems but the  
449 amount consumed and sex of the fetus plays an important role in determining outcomes.

#### 450 ***Conclusions***

451 Given that women are increasingly delaying child-bearing, it is imperative that nutritional or  
452 environmental insults during pregnancy, that could impact on the establishment of the  
453 primordial follicle pool and hence the reproductive lifespan, are identified. Results from this  
454 preclinical study suggest that a moderate, episodic exposure to alcohol during pregnancy does  
455 not impact on ovarian reserve and subsequent fertility in adulthood. However, the previously  
456 reported metabolic deficits in male offspring from the same litters indicates that abstaining  
457 from alcohol consumption during pregnancy is the safest option for long-term offspring  
458 health.

459

#### 460 **Declaration of interest**

461 The authors have no conflicts of interest to declare.

462

#### 463 **Funding**

464 This work was supported by the University of Queensland Early Career Researcher Grants  
465 Scheme (to LKA) and the National Health and Medical Research Council (to KMM,  
466 APP1078164).

467

#### 468 **Author contribution statement**

469 LKA conceived the study, analysed and finalised data, wrote the first draft of the manuscript  
470 and finalised the final version for submission. EKM and SES performed experiments, tissue  
471 preparation, assisted with data analysis and contributed to a first draft of the manuscript. SHL  
472 and KJH provided training and intellectual input for stereology. KMM provided intellectual  
473 input on study design and analysis and contributed to early drafts of the manuscript. All  
474 authors contributed to editing early drafts of the manuscript.

475

#### 476 **Acknowledgements**

477 The authors would like to acknowledge Natasha Steiger (Animal Endocrinology Lab, School  
478 of Biomedical Sciences, University of Queensland) for analysis of plasma hormones; Dave  
479 Sterne and Barb Arnts (University of Queensland Biological Resources) for animal  
480 treatments and husbandry; Erica Mu (School of Biomedical Sciences Histology Facility,  
481 University of Queensland) for serial sectioning of neonatal ovaries; Shaun Walters (School of  
482 Biomedical Sciences Imaging Facility, University of Queensland) for technical assistance  
483 with stereology; Tam Nguyen (School of Biomedical Sciences, University of Queensland) for  
484 assistance with animal work; and Jacobus Ungerer (Pathology Queensland, Queensland  
485 Health) for analysis of BAC.

486

487 **References**

- 488 **Akison, LK, KM Moritz, and N Reid** 2019 Adverse reproductive outcomes associated with  
489 fetal alcohol exposure: a systematic review. *Reproduction* **157** 329-343.
- 490 **Alvigi, C, P Humaidan, CM Howles, D Tredway, and SG Hillier** 2009 Biological versus  
491 chronological ovarian age: implications for assisted reproductive technology. *Reprod*  
492 *Biol Endocrinol* **7** 101.
- 493 **Bernal, AB, MH Vickers, MB Hampton, RA Poynton, and DM Sloboda** 2010 Maternal  
494 undernutrition significantly impacts ovarian follicle number and increases ovarian  
495 oxidative stress in adult rat offspring. *PLoS One* **5** e15558.
- 496 **Boggan, WO, CL Randall, and HM Dodds** 1979 Delayed sexual maturation in female  
497 C57BL/6J mice prenatally exposed to alcohol. *Res Commun Chem Pathol Pharmacol*  
498 **23** 117-125.
- 499 **Camlin, NJ, AP Sobinoff, JM Sutherland, EL Beckett, AG Jarnicki, RL Vanders, PM**  
500 **Hansbro, EA McLaughlin, and JE Holt** 2016 Maternal smoke exposure impairs the  
501 long-term fertility of female offspring in a murine model. *Biol Reprod* **94** 39.
- 502 **Choi, JI, KD Han, DW Lee, MJ Kim, YJ Shin, and HN Lee** 2017 Relationship between  
503 alcohol consumption and age at menopause: The Korea National Health and Nutrition  
504 Examination Survey. *Taiwan J Obstet Gynecol* **56** 482-486.
- 505 **Cruz, G, D Fernandois, and AH Paredes** 2017 Ovarian function and reproductive  
506 senescence in the rat: role of ovarian sympathetic innervation. *Reproduction* **153** R59-  
507 R68.
- 508 **Dickinson, H, TJ Moss, KL Gatford, KM Moritz, L Akison, T Fullston, DH Hryciw, CA**  
509 **Maloney, MJ Morris, AL Wooldridge, JE Schjenken, SA Robertson, BJ**  
510 **Waddell, PJ Mark, CS Wyrwoll, SJ Ellery, KL Thornburg, BS Muhlhausler,**

- 511           **and JL Morrison** 2016 A review of fundamental principles for animal models of  
512           DOHaD research: an Australian perspective. *J Dev Orig Health Dis* **7** 449-472.
- 513   **Durlinger, AL, MJ Gruijters, P Kramer, B Karels, HA Ingraham, MW Nachtigal, JT**  
514           **Uilenbroek, JA Grootegoed, and AP Themmen** 2002 Anti-Mullerian hormone  
515           inhibits initiation of primordial follicle growth in the mouse ovary. *Endocrinology*  
516           **143** 1076-1084.
- 517   **Elton, CW, JS Pennington, SA Lynch, FM Carver, and SN Pennington** 2002 Insulin  
518           resistance in adult rat offspring associated with maternal dietary fat and alcohol  
519           consumption. *J Endocrinol* **173** 63-71.
- 520   **Esquifino, AI, R Sanchis, and C Guerri** 1986 Effect of prenatal alcohol exposure on sexual  
521           maturation of female rat offspring. *Neuroendocrinology* **44** 483-487.
- 522   **Finch, CE** 2014 The menopause and aging, a comparative perspective. *J Steroid Biochem*  
523           *Mol Biol* **142** 132-141.
- 524   **Findlay, JK, KJ Hutt, M Hickey, and RA Anderson** 2015a How Is the number of  
525           primordial follicles in the ovarian reserve established? *Biol Reprod* **93** 111.
- 526   **Findlay, JK, KJ Hutt, M Hickey, and RA Anderson** 2015b What is the "ovarian reserve"?  
527           *Fertil Steril* **103** 628-630.
- 528   **Flaws, JA, AN Hirshfield, JA Hewitt, JK Babus, and PA Furth** 2001 Effect of bcl-2 on  
529           the primordial follicle endowment in the mouse ovary. *Biol Reprod* **64** 1153-1159.
- 530   **Gavaler, JS** 1985 Effects of alcohol on endocrine function in postmenopausal women: a  
531           review. *J Stud Alcohol* **46** 495-516.
- 532   **Geuna, S, and C Herrera-Rincon** 2015 Update on stereology for light microscopy. *Cell*  
533           *Tissue Res* **360** 5-12.
- 534   **Gill, J** 2000 The effects of moderate alcohol consumption on female hormone levels and  
535           reproductive function. *Alcohol Alcohol* **35** 417-423.

- 536 **Gray, SP, KM Denton, L Cullen-McEwen, JF Bertram, and KM Moritz** 2010 Prenatal  
537 exposure to alcohol reduces nephron number and raises blood pressure in progeny. *J*  
538 *Am Soc Nephrol* **21** 1891-1902.
- 539 **Hard, E, IL Dahlgren, J Engel, K Larsson, S Liljequist, AS Lindh, and B Musi** 1984  
540 Development of sexual behavior in prenatally ethanol-exposed rats. *Drug Alcohol*  
541 *Depend* **14** 51-61.
- 542 **Hawkins Bressler, L, LA Bernardi, PJD De Chavez, DD Baird, MR Carnethon, and EE**  
543 **Marsh** 2016 Alcohol, cigarette smoking, and ovarian reserve in reproductive-age  
544 African-American women. *Am J Obstet Gynecol* **215** 758.e751-758.e759.
- 545 **Holt, JE, A Jackson, SD Roman, RJ Aitken, P Koopman, and EA McLaughlin** 2006  
546 CXCR4/SDF1 interaction inhibits the primordial to primary follicle transition in the  
547 neonatal mouse ovary. *Dev Biol* **293** 449-460.
- 548 **Hunt, PA, C Lawson, M Gieske, B Murdoch, H Smith, A Marre, T Hassold, and CA**  
549 **VandeVoort** 2012 Bisphenol A alters early oogenesis and follicle formation in the  
550 fetal ovary of the rhesus monkey. *Proc Natl Acad Sci U S A* **109** 17525-17530.
- 551 **Hutt, KJ** 2015 The role of BH3-only proteins in apoptosis within the ovary. *Reproduction*  
552 **149** R81-89.
- 553 **Ishitsuka, K, K Hanada-Yamamoto, H Mezawa, M Saito-Abe, M Konishi, Y Ohya, and**  
554 **the Japan Environment and Children's Study Group** 2019 Determinants of  
555 alcohol consumption in women before and after awareness of conception. *Matern*  
556 *Child Health J* Epub ahead of print 18 Dec 2019. [https://doi.org/2010.1007/s10995-](https://doi.org/2010.1007/s10995-10019-02840-10992)  
557 [10019-02840-10992](https://doi.org/2010.1007/s10995-10019-02840-10992).
- 558 **Jiang, ZZ, MW Hu, XS Ma, H Schatten, HY Fan, ZB Wang, and QY Sun** 2016 LKB1  
559 acts as a critical gatekeeper of ovarian primordial follicle pool. *Oncotarget* **7** 5738-  
560 5753.

- 561 **Kalisch-Smith, JI, SE Steane, DG Simmons, M Pantaleon, ST Anderson, LK Akison,**  
562 **ME Wlodek, and KM Moritz** 2019 Periconceptional alcohol exposure causes  
563 female-specific perturbations to trophoblast differentiation and placental formation in  
564 the rat. *Development* **146**.
- 565 **Kelsey, TW, RA Anderson, P Wright, SM Nelson, and WH Wallace** 2012 Data-driven  
566 assessment of the human ovarian reserve. *Mol Hum Reprod* **18** 79-87.
- 567 **Kilkenny, C, and DG Altman** 2010 Improving bioscience research reporting: ARRIVE-ing  
568 at a solution. *Lab Anim* **44** 377-378.
- 569 **Kilkenny, C, W Browne, IC Cuthill, M Emerson, DG Altman, and NCRRGW Group**  
570 2010 Animal research: reporting in vivo experiments: the ARRIVE guidelines. *Br J*  
571 *Pharmacol* **160** 1577-1579.
- 572 **Lan, N, AW Vogl, and J Weinberg** 2013 Prenatal ethanol exposure delays the onset of  
573 spermatogenesis in the rat. *Alcohol Clin Exp Res* **37** 1074-1081.
- 574 **Lan, N, F Yamashita, AG Halpert, JH Sliwowska, V Viau, and J Weinberg** 2009 Effects  
575 of prenatal ethanol exposure on hypothalamic-pituitary-adrenal function across the  
576 estrous cycle. *Alcohol Clin Exp Res* **33** 1075-1088.
- 577 **Leeman, RF, M Heilig, CL Cunningham, DN Stephens, T Duka, and SS O'Malley** 2010  
578 Ethanol consumption: how should we measure it? Achieving concisence between  
579 human and animal phenotypes. *Addict Biol* **15** 109-124.
- 580 **Liew, SH, K Vaithyanathan, M Cook, P Bouillet, CL Scott, JB Kerr, A Strasser, JK**  
581 **Findlay, and KJ Hutt** 2014 Loss of the proapoptotic BH3-only protein BCL-2  
582 modifying factor prolongs the fertile life span in female mice. *Biol Reprod* **90** 77.
- 583 **Liew, SH, K Vaithyanathan, and KJ Hutt** 2016 Taking control of the female fertile  
584 lifespan: a key role for Bcl-2 family proteins. *Reprod Fertil Dev* **28** 864-871.



- 585 **McCormack, C, D Hutchinson, L Burns, J Wilson, E Elliott, S Allsop, J Najman, S**  
586 **Jacobs, L Rossen, C Olsson, and R Mattick** 2017 Prenatal alcohol consumption  
587 between conception and recognition of pregnancy. *Alcohol Clin Exp Res* **41** 369-378.
- 588 **McGivern, RF, J McGeary, S Robeck, S Cohen, and RJ Handa** 1995 Loss of  
589 reproductive competence at an earlier age in female rats exposed prenatally to  
590 ethanol. *Alcohol Clin Exp Res* **19** 427-433.
- 591 **McGivern, RF, WJ Raum, RJ Handa, and RZ Sokol** 1992 Comparison of two weeks  
592 versus one week of prenatal ethanol exposure in the rat on gonadal organ weights,  
593 sperm count, and onset of puberty. *Neurotoxicol Teratol* **14** 351-358.
- 594 **McGivern, RF, and SM Yellon** 1992 Delayed onset of puberty and subtle alterations in  
595 GnRH neuronal morphology in female rats exposed prenatally to ethanol. *Alcohol* **9**  
596 335-340.
- 597 **Mossa, F, F Carter, SW Walsh, DA Kenny, GW Smith, JL Ireland, TB Hildebrandt, P**  
598 **Lonergan, JJ Ireland, and AC Evans** 2013 Maternal undernutrition in cows impairs  
599 ovarian and cardiovascular systems in their offspring. *Biol Reprod* **88** 1-9.
- 600 **Muggli, E, C O’Leary, S Donath, F Orsini, D Forster, PJ Anderson, S Lewis, C Nagle,**  
601 **JM Craig, E Elliott, and J Halliday** 2016 “Did you ever drink more?” A detailed  
602 description of pregnant women’s drinking patterns. *BMC Public Health* **16** 683.
- 603 **Myers, M, KL Britt, NG Wreford, FJ Ebling, and JB Kerr** 2004 Methods for quantifying  
604 follicular numbers within the mouse ovary. *Reproduction* **127** 569-580.
- 605 **Myers, M, BS Middlebrook, MM Matzuk, and SA Pangas** 2009 Loss of inhibin alpha  
606 uncouples oocyte-granulosa cell dynamics and disrupts postnatal folliculogenesis.  
607 *Dev Biol* **334** 458-467.
- 608 **Myers, M, FH Morgan, SH Liew, N Zerafa, TU Gamage, M Sarraj, M Cook, I Kapic, A**  
609 **Sutherland, CL Scott, A Strasser, JK Findlay, JB Kerr, and KJ Hutt** 2014

- 610 PUMA regulates germ cell loss and primordial follicle endowment in mice.  
611 *Reproduction* **148** 211-219.
- 612 **National Health and Medical Research Council** 2009 Australian Guidelines to Reduce  
613 Health Risks from Drinking Alcohol, pp. 181. Canberra, ACT: Commonwealth of  
614 Australia.
- 615 **Nguyen, TMT, SE Steane, KM Moritz, and LK Akison** 2019 Prenatal alcohol exposure  
616 programmes offspring disease: insulin resistance in adult males in a rat model of acute  
617 exposure. *J Physiol* **597** 5619-5637.
- 618 **Pangas, SA** 2012 Regulation of the ovarian reserve by members of the transforming growth  
619 factor beta family. *Mol Reprod Dev* **79** 666-679.
- 620 **Picut, CA, D Dixon, ML Simons, DG Stump, GA Parker, and AK Remick** 2015 Postnatal  
621 ovary development in the rat: morphologic study and correlation of morphology to  
622 neuroendocrine parameters. *Toxicol Pathol* **43** 343-353.
- 623 **Polanco, TA, C Crismale-Gann, KR Reuhl, DK Sarkar, and WS Cohick** 2010 Fetal  
624 alcohol exposure increases mammary tumor susceptibility and alters tumor phenotype  
625 in rats. *Alcohol Clin Exp Res* **34** 1879-1887.
- 626 **Popova, S, S Lange, C Probst, G Gmel, and J Rehm** 2017 Estimation of national, regional,  
627 and global prevalence of alcohol use during pregnancy and fetal alcohol syndrome: a  
628 systematic review and meta-analysis. *Lancet Glob Health* **5** e290-e299.
- 629 **Rachdaoui, N, and DK Sarkar** 2017 Pathophysiology of the effects of alcohol abuse on the  
630 endocrine system. *Alcohol Res* **38** 255-276.
- 631 **Reddy, P, L Liu, D Adhikari, K Jagarlamudi, S Rajareddy, Y Shen, C Du, W Tang, T**  
632 **Hamalainen, SL Peng, ZJ Lan, AJ Cooney, I Huhtaniemi, and K Liu** 2008  
633 Oocyte-specific deletion of Pten causes premature activation of the primordial follicle  
634 pool. *Science* **319** 611-613.

- 635 **Reddy, P, W Zheng, and K Liu** 2010 Mechanisms maintaining the dormancy and survival  
636 of mammalian primordial follicles. *Trends Endocrinol Metab* **21** 96-103.
- 637 **Richardson, MC, M Guo, BC Fauser, and NS Macklon** 2014 Environmental and  
638 developmental origins of ovarian reserve. *Hum Reprod Update* **20** 353-369.
- 639 **Robe, LB, RS Robe, and PA Wilson** 1979 Maternal heavy drinking related to delayed onset  
640 of daughters menstruation. *Curr Alcohol* **7** 515-520.
- 641 **Sarraj, MA, and AE Drummond** 2012 Mammalian foetal ovarian development:  
642 consequences for health and disease. *Reproduction* **143** 151-163.
- 643 **Stringer, J, E Groenewegen, SH Liew, and KJ Hutt** 2019 Nicotinamide mononucleotide  
644 does not protect the ovarian reserve from cancer treatments. *Reproduction* Epub ahead  
645 of print 01 Nov 2019. <https://doi.org/2010.1530/REP-2019-0337>.
- 646 **te Velde, ER** 1998 Ovarian ageing and postponement of childbearing. *Maturitas* **30** 103-104.
- 647 **Udani, M, S Parker, J Gavalier, and DH Van Thiel** 1985 Effects of in utero exposure to  
648 alcohol upon male rats. *Alcohol Clin Exp Res* **9** 355-359.
- 649 **Umer, A, C Lilly, C Hamilton, A Baldwin, J Breyel, A Tolliver, C Mullins, C John, and**  
650 **S Maxwell** 2020 Prevalence of alcohol use in late pregnancy. *Pediatr Res* Epub ahead  
651 of print 03 Jan 2020. <https://doi.org/2010.1038/s41390-41019-40731-y>.
- 652 **Van Heertum, K, and B Rossi** 2017 Alcohol and fertility: how much is too much? *Fertil*  
653 *Res Pract* **3** 10.
- 654 **Wallace, WH, and TW Kelsey** 2010 Human ovarian reserve from conception to the  
655 menopause. *PLoS One* **5** e8772.
- 656 **Wear, HM, MJ McPike, and KH Watanabe** 2016 From primordial germ cells to  
657 primordial follicles: a review and visual representation of early ovarian development  
658 in mice. *J Ovarian Res* **9** 36.

- 659 **Winship, AL, SE Gazzard, LA Cullen-McEwen, JF Bertram, and KJ Hutt** 2018  
660 Maternal low-protein diet programmes low ovarian reserve in offspring. *Reproduction*  
661 **156** 299-311.
- 662 **World Health Organisation** 2004 Department of Mental Health and Substance Abuse:  
663 Alcohol Policy. Geneva.
- 664 **Zuckerman, S** 1951 The number of oocytes in the mature ovary. *Recent Prog Horm Res* **6**  
665 63-108.
- 666
- 667

668 **Figure legends**

669 **Figure 1 Flow chart of animals treated and offspring used in each experiment.** Pregnant  
670 dams were treated with either saline or 1 g/kg body weight ethanol (EtOH) via gavage. Note  
671 that one EtOH litter was excluded from further experiments given the litter size was 7 (mean,  
672 range for other litters: 15, 11-19). \* A separate cohort of offspring from these litters were also  
673 examined for metabolic outcomes (reported in Nguyen et al. 2019). ^  $n=5$  at PN3 due to  
674 aging error for 1 litter. ^^ Estradiol measured in a separate group of females to those used for  
675 estrous cycles etc. E, embryonic day; E2, estradiol; F, female; P4, progesterone; PN,  
676 postnatal day; qPCR, quantitative real-time polymerase chain reaction.

677

678 **Figure 2 Moderate, acute prenatal alcohol exposure did not alter ovarian oocyte or**  
679 **follicle numbers in neonatal rat offspring.** Pregnant dams were treated with ethanol (EtOH,  
680 1 g/kg body weight) or saline (control) at embryonic day (E) 13.5 and 14.5. (A) Oocyte  
681 numbers within ovarian cysts or nests prior to follicle formation in postnatal day (PN) 3  
682 ovaries. B) Non-growing primordial follicles (ovarian reserve) in PN3 and PN10 ovaries. (C)  
683 Early growing follicles (transitional or primary) in PN3 ovaries. D) Growing follicles  
684 (transitional, primary, secondary and antral) in PN10 ovaries. All data are presented as mean  
685  $\pm$  SEM. Open bars/circles indicate control offspring ( $n = 8$  from 6 litters at both ages); grey  
686 bars/solid circles indicate EtOH offspring ( $n = 9$  from 6 litters at PN3;  $n = 8$  from 6 litters at  
687 PN10). Data were analysed using an unpaired t-test (parametric data) or non-parametric  
688 Mann-Whitney rank sum test to determine significant differences between groups for oocytes  
689 or each follicle type, with significance determined at  $P < 0.05$ .

690

691 **Figure 3 Moderate, acute prenatal alcohol exposure did not alter puberty onset in**  
692 **adolescent female rat offspring.** Pregnant dams were treated with ethanol (EtOH, 1 g/kg

693 body weight) or saline (control) at embryonic day (E) 13.5 and 14.5. (A) Age at puberty onset  
694 (as defined by vaginal opening). (B) Cumulative percentage of female offspring exhibiting  
695 puberty onset with increasing age. (C) Age at first estrous, as determined by vaginal electrical  
696 impedance  $>4\text{k}\Omega$ . (D) Cumulative percentage of female offspring with estrous cycles with  
697 increasing age. For A) and C), open bars/circles indicate control offspring (litter averages  
698 from  $n = 8$  litters; 5-7 females per litter); grey bars/solid circles indicate EtOH offspring  
699 (litter averages from  $n = 9$  litters); all data are presented as mean  $\pm$  SEM. Data analysed using  
700 unpaired t-tests. For B) and D), open circles indicate control offspring; solid circles indicate  
701 EtOH offspring; all data shown as % of all offspring across litters (number of litters as for A)  
702 and B)). Data compared at postnatal (PN) 33-35 in B) and at PN36-40 in D) using Fisher's  
703 Exact test. Significance for all tests was set at  $P < 0.05$ .

704

705 **Figure 4 Moderate, acute prenatal alcohol exposure did not alter reproductive outcomes**  
706 **in adult female rat offspring.** Pregnant dams were treated with ethanol (EtOH, 1 g/kg body  
707 weight) or saline (control) at embryonic day (E) 13.5 and 14.5. (A) An example of vaginal  
708 impedance readings over a 21-day monitoring period, indicating regular estrous cycles. Peaks  
709  $>4\text{k}\Omega$  indicate estrous. (B) Number of estrous cycles measured over the 21-day monitoring  
710 period. (C) Average length of estrous cycles (per female) measured over the 21-day  
711 monitoring period. For B) and C),  $n = 8$  per group (1 female from each litter). (D) Plasma  
712 estradiol in 6-month old female offspring during estrous (vaginal impedance  $>4\text{k}\Omega$ );  $n = 16$   
713 (control) or 18 (EtOH) per group (2 females from each litter). E) Number of implantation  
714 sites per mated female offspring at embryonic day (E) 9-11. (F) Plasma progesterone levels  
715 of mated female offspring at E9-11. For E) to F),  $n = 8$  (control) or 9 (EtOH) per group (1  
716 female from each litter). For B) - F), open bars/circles indicate control offspring; grey  
717 bars/solid circles indicate EtOH offspring; all data are presented as mean  $\pm$  SEM. Data were

718 analysed using an unpaired t-test (parametric data) or non-parametric Mann-Whitney rank  
719 sum test (indicated by <sup>+</sup>) to determine significant differences between groups, with  
720 significance determined at  $P < 0.05$ .

**Table 1 Primers used for real-time quantitative PCR analysis of genes regulating primordial follicle numbers.** All primers were Assay-on-Demand primer/probe sets from Thermo Fisher Scientific (Richlands, QLD, Australia).

| Gene name                                                         | Gene symbol         | Assay ID      | Amplicon size (bp) | Accession number(s)                                                                             |
|-------------------------------------------------------------------|---------------------|---------------|--------------------|-------------------------------------------------------------------------------------------------|
| BCL-2 associated X protein                                        | <i>Bax</i>          | Rn01480161_g1 | 63                 | NM_017059.2                                                                                     |
| BCL-2 antagonist/killer 1                                         | <i>Bak1</i>         | Rn00587491_m1 | 64                 | NM_053812.1<br>XM_006256101.2                                                                   |
| B cell leukemia/lymphoma 2                                        | <i>Bcl2</i>         | Rn99999125_m1 | 104                | NM_016993.1                                                                                     |
| BCL2-like 1                                                       | <i>Bcl2l1</i>       | Rn00437783_m1 | 65                 | NM_001033670.1<br>XM_006235265.2                                                                |
| BCL2-like 11 (apoptosis facilitator)                              | <i>Bcl2l11</i>      | Rn00674175_m1 | 64                 | NM_022612.1<br>NM_171988.2<br>NM_171989.1<br>XM_006234983.2<br>XM_006234985.2<br>XM_006234987.2 |
| BCL2 binding component 3 (p53-upregulated modulator of apoptosis) | <i>Bbc3 (Puma)</i>  | Rn00597992_m1 | 62                 | NM_173837.2                                                                                     |
| Inhibin alpha                                                     | <i>Inha</i>         | Rn00561423_m1 | 58                 | NM_012590.2                                                                                     |
| Anti-mullerian hormone                                            | <i>Amh</i>          | Rn00563731_g1 | 92                 | NM_037034.1                                                                                     |
| Serine/threonine kinase 11 (Liver kinase B1)                      | <i>Stk11 (Lkb1)</i> | Rn01535544_m1 | 59                 | NM_001108069.1<br>XM_006240910.1<br>XM_008765096.1                                              |
| Chemokine (C-X-C motif) ligand 12                                 | <i>Cxcl12</i>       | Rn00573260_m1 | 60                 | NM_001033882.1<br>NM_001033883.1<br>NM_022177.3                                                 |
| Chemokine (C-X-C motif) receptor 4                                | <i>Cxcr4</i>        | Rn00573522_s1 | 58                 | NM_022205.3                                                                                     |
| Phosphatase and tensin homolog                                    | <i>Pten</i>         | Rn00477208_m1 | 73                 | NM_031606.1                                                                                     |
| Hypoxanthine phosphoribosyltransferase *                          | <i>Hprt</i>         | Rn01527840_m1 | 64                 | NM_012583.2                                                                                     |



\* Endogenous control. Note that a previous (unpublished) pilot study, using neonatal ovaries collected at similar ages from female offspring exposed to prenatal alcohol, found that *Hprt* was the only stably expressed gene across EtOH-treated and control ovaries from 10 tested (*Actb*, *Rpl19*, *Hprt*, *Mrpl1*, *Pgk1*, *Sdha*, *Rpl0*, *Rpl13*, *Ppia*, *18S*).

1 **Table 2 Maternal parameters for rat dams treated with saline (control) or ethanol**  
 2 **(EtOH).** All animals treated by oral gavage on embryonic day 13.5 and 14.5.

| <b>Parameter</b>                                             | <b>Control</b><br>(n = 14) | <b>EtOH</b><br>(n = 15) | <b>P value</b>    |
|--------------------------------------------------------------|----------------------------|-------------------------|-------------------|
| Body weight at mating (g)                                    | 252 ± 3                    | 256 ± 4                 | 0.41              |
| Body weight at E13.5 (g)                                     | 309 ± 4                    | 315 ± 4                 | 0.30              |
| <b>Total weight gain (g)</b>                                 |                            |                         |                   |
| Pre-gavage (mating to E12.5)                                 | 52 ± 3                     | 56 ± 3                  | 0.28              |
| Post-gavage (E15.5 to birth)                                 | 91 ± 5                     | 93 ± 3                  | 0.75              |
| <b>Water consumption (mL/day)</b>                            |                            |                         |                   |
| Pre-gavage (E12.5) <sup>^</sup>                              | 31.9 ± 1.5                 | 29.3 ± 1.2              | 0.19              |
| During gavage (E13.5-E14.5)                                  | 28.5 ± 1.6                 | 26.9 ± 1.2              | 0.42              |
| Post-gavage (E15.5 to birth)                                 | 37.9 ± 1.2                 | 35.3 ± 1.2              | 0.12 <sup>*</sup> |
| <b>Chow consumption (g/day)</b>                              |                            |                         |                   |
| Pre-gavage (E12.5) <sup>^</sup>                              | 24.7 ± 0.8                 | 24.9 ± 0.8              | 0.83              |
| During gavage (E13.5-E14.5)                                  | 22.3 ± 0.9                 | 21.2 ± 0.7              | 0.37              |
| Post-gavage (E15.5 to birth)                                 | 26.2 ± 0.7                 | 26.1 ± 0.6              | 0.88              |
| <b>Pregnancy variables</b>                                   |                            |                         |                   |
| Litter sex ratio (M:F)                                       | 0.95 ± 0.1                 | 0.99 ± 0.1              | 0.71 <sup>*</sup> |
| Litter size                                                  | 14 <sup>†</sup>            | 15 <sup>†</sup>         | 0.11              |
| Plasma progesterone (nmol/L) <sup>%</sup>                    | 52.7 ± 5.5                 | 71.8 ± 9.9              | 0.14 <sup>*</sup> |
| <b>Blood alcohol concentration (BAC) (mg/dL)<sup>^</sup></b> |                            |                         |                   |
| 1h post E13.5 gavage                                         | <LD <sup>‡</sup>           | 41.3 ± 6.2              | -                 |
| 5h post E13.5 gavage                                         | <LD <sup>‡</sup>           | <LD                     | -                 |
| 1h post E14.5 gavage                                         | <LD <sup>‡</sup>           | 42.9 ± 6.3              | -                 |
| 5h post E14.5 gavage                                         | <LD <sup>‡</sup>           | <LD                     | -                 |

3 Data are presented as mean ± SEM. P values were obtained using an unpaired Student's t-test. Threshold for  
 4 significance:  $P < 0.05$ .  
 5 <LD = below the limit of detection (5 mg/dL or 0.005%); E = embryonic day; EtOH = ethanol; M = male; F =  
 6 female.  
 7 <sup>\*</sup> Indicates data not normally distributed and analysed with a non-parametric Mann-Whitney U-test.  
 8 <sup>^</sup> Indicates not all samples included in analysis. See Supplemental Data 1 for details.  
 9 <sup>†</sup> Denotes parameters expressed as whole pups.  
 10 <sup>‡</sup> Measured in 6 animals only.  
 11 <sup>%</sup> Measured at E19.5; 1 sample missing from each group.

12 **Table 3 Postnatal weights (g) of female rat offspring from saline (Control) and ethanol**  
13 **(EtOH) treated litters used to examine reproductive parameters.** All offspring from dams  
14 treated by oral gavage at embryonic day 13.5 and 14.5. Sample sizes in brackets.

| Age                                       | Control        | EtOH           | P value           |
|-------------------------------------------|----------------|----------------|-------------------|
| <i>Neonates</i> <sup>*</sup>              |                |                |                   |
| PN3                                       | 8.2 ± 0.3 (5)  | 8.3 ± 0.3 (6)  | 0.94              |
| PN10                                      | 22.7 ± 0.6 (6) | 20.9 ± 0.7 (6) | 0.09              |
| <i>Adolescents</i>                        |                |                |                   |
| PN28 <sup>^</sup>                         | 64.8 ± 0.8 (8) | 67.6 ± 2.8 (9) | 0.37 <sup>‡</sup> |
| <i>Estrous cycles/mating/progesterone</i> |                |                |                   |
| 6 months <sup>†</sup>                     | 317 ± 17 (8)   | 301 ± 7 (9)    | 0.42 <sup>‡</sup> |
| <i>Pro-estrous cull/estradiol</i>         |                |                |                   |
| 6 months <sup>†</sup>                     | 330 ± 12 (16)  | 323 ± 6 (18)   | 0.61 <sup>‡</sup> |

15 Data are presented as mean ± SEM. P values were obtained using an unpaired Student's t-test, with Welch's  
16 correction for unequal variances as shown (<sup>‡</sup>). Threshold for significance: P<0.05. See Supplemental Data 1 for  
17 details.

18 EtOH = ethanol; PN = postnatal day.

19 <sup>\*</sup> At PN3 and PN10, data averaged across 2-4 female offspring per litter. Only 1-2 females per litter were used  
20 for either gene expression studies (both ovaries frozen) or stereology/histology (both ovaries fixed).

21 <sup>^</sup> At PN28, data averaged across 5-7 female offspring per litter. All females were then assessed for puberty  
22 onset from PN30.

23 <sup>†</sup> At 6 months, 1 female per litter was used for monitoring estrous cycles and then mated to assess pregnancy  
24 success/implantation rate. Weight shown is from 1<sup>st</sup> day of estrous cycle monitoring. Two additional females per  
25 litter were culled at 6 months at pro-estrous for measurement of estradiol.

26

27 **Table 4 Expression of factors regulating primordial follicle numbers in neonatal ovaries**  
 28 **from female rat offspring at postnatal day 3 (PN3).** All offspring from dams treated by  
 29 oral gavage at embryonic day 13.5 and 14.5.

| <b>Gene of interest</b>                       | <b>Control</b><br>(n = 10) | <b>EtOH</b><br>(n = 10)  | <b>P value</b>    |
|-----------------------------------------------|----------------------------|--------------------------|-------------------|
| <b><i>Apoptotic pathway</i></b>               |                            |                          |                   |
| <i>Bax</i>                                    | 1.00 ± 0.10                | 0.96 ± 0.09              | 0.79              |
| <i>Bak1</i>                                   | 1.00 ± 0.06                | 0.91 ± 0.08              | 0.41              |
| <i>Bcl2</i>                                   | 1.00 ± 0.11                | 0.83 ± 0.08              | 0.23              |
| <i>Bcl2l1</i>                                 | 1.00 ± 0.07                | 0.87 ± 0.10              | 0.27              |
| <i>Bcl2l11</i>                                | 1.00 ± 0.11                | 0.82 ± 0.10              | 0.25              |
| <i>Puma/Bbc3</i>                              | 1.00 ± 0.14                | 1.26 ± 0.17 <sup>^</sup> | 0.25              |
| <b><i>Follicle growth and recruitment</i></b> |                            |                          |                   |
| <i>Inha</i>                                   | 1.00 ± 0.07                | 0.78 ± 0.08              | 0.07              |
| <i>Amh</i>                                    | 1.00 ± 0.20                | 0.83 ± 0.19              | 0.39 <sup>*</sup> |
| <i>Stk11/Lkb1</i>                             | 1.00 ± 0.09                | 0.89 ± 0.11              | 0.43              |
| <i>Cxcl12</i>                                 | 1.00 ± 0.14                | 0.90 ± 0.14              | 0.63              |
| <i>Cxcr4</i>                                  | 1.00 ± 0.05                | 0.79 ± 0.08              | 0.04              |
| <i>Pten</i>                                   | 1.00 ± 0.08                | 0.89 ± 0.08              | 0.34              |

30 Data are presented as mean ± SEM fold change, relative to *Hprt* endogenous control and normalised to the  
 31 control group (i.e. set to an average fold change of 1). *P* values were obtained using an unpaired Student's t-test.  
 32 Threshold for significance: *P*<0.05 (or <0.004, with Bonferroni correction for multiple testing). 1-2 female  
 33 offspring used per litter for controls (across 5 litters) and EtOH treated (across 6 litters). See Supplemental Data  
 34 1 for details.

35 EtOH = ethanol.

36 <sup>\*</sup> Indicates data not normally distributed and analysed with a non-parametric Mann-Whitney U-test.

37 <sup>^</sup> 1 sample missing from this group due to qPCR error.

38

39 **Table 5 Expression of factors regulating primordial follicle numbers in neonatal ovaries**  
 40 **from female rat offspring at postnatal day 10 (PN10).** All offspring from dams treated by  
 41 oral gavage at embryonic day 13.5 and 14.5.

| <b>Gene of interest</b>                       | <b>Control</b><br>(n = 10) | <b>EtOH</b><br>(n = 12) | <b>P value</b> |
|-----------------------------------------------|----------------------------|-------------------------|----------------|
| <b><i>Apoptotic pathway</i></b>               |                            |                         |                |
| <i>Bax</i>                                    | 1.00 ± 0.08                | 0.87 ± 0.09             | 0.23*          |
| <i>Bak1</i>                                   | 1.00 ± 0.13                | 1.02 ± 0.09             | 0.28*          |
| <i>Bcl2</i>                                   | 1.00 ± 0.08                | 0.98 ± 0.09             | 0.90           |
| <i>Bcl2l1</i>                                 | 1.00 ± 0.10                | 1.07 ± 0.10             | 0.62           |
| <i>Bcl2l11</i>                                | 1.00 ± 0.13                | 1.15 ± 0.12             | 0.42*          |
| <i>Puma/Bbc3</i>                              | 1.00 ± 0.08                | 0.95 ± 0.10             | 0.69           |
| <b><i>Follicle growth and recruitment</i></b> |                            |                         |                |
| <i>Inha</i>                                   | 1.00 ± 0.14                | 1.13 ± 0.13             | 0.50           |
| <i>Amh</i>                                    | 1.00 ± 0.23                | 0.79 ± 0.09             | 0.63*          |
| <i>Stk11/Lkb1</i>                             | 1.00 ± 0.11                | 1.04 ± 0.10             | 0.77           |
| <i>Cxcl12</i>                                 | 1.00 ± 0.13                | 1.25 ± 0.17             | 0.27           |
| <i>Cxcr4</i>                                  | 1.00 ± 0.11                | 1.04 ± 0.10             | 0.81           |
| <i>Pten</i>                                   | 1.00 ± 0.10                | 1.13 ± 0.11             | 0.38*          |

42 Data are presented as mean ± SEM fold change, relative to *Hprt* endogenous control and normalised to the  
 43 control group (i.e. set to an average fold change of 1). *P* values were obtained using an unpaired Student's t-test.  
 44 Threshold for significance: *P*<0.05 (or <0.004, with Bonferroni correction for multiple testing). 1-2 female  
 45 offspring used per litter for controls (across 6 litters) and EtOH treated (across 6 litters). See Supplemental Data  
 46 1 for details.

47 EtOH = ethanol.

48 \* Indicates data not normally distributed and analysed with a non-parametric Mann-Whitney U-test.

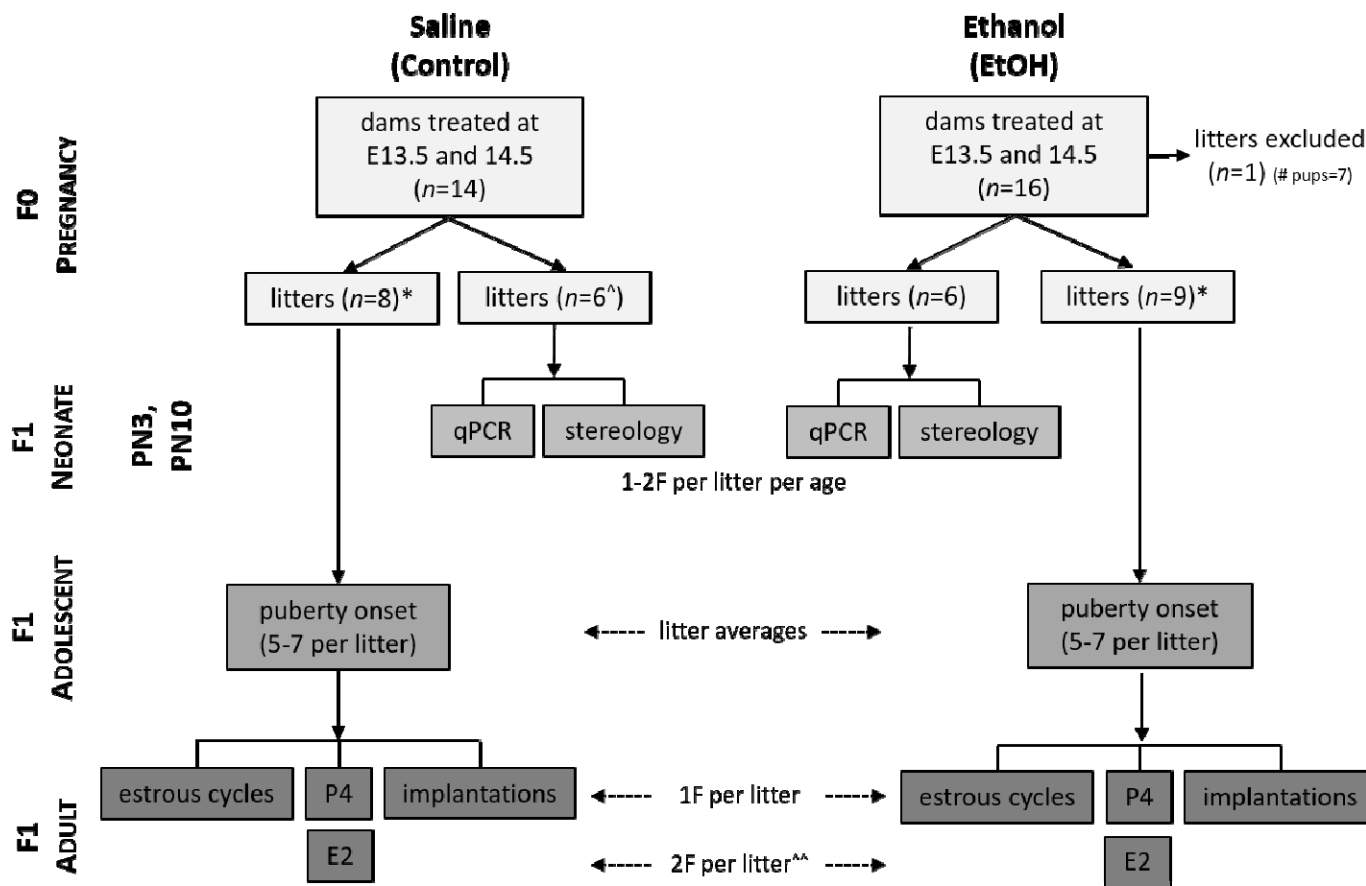

49 **Figure 1**

50 **Figure 1 Flow chart of animals treated and offspring used in each experiment.** Pregnant dams were treated with either saline or 1 g/kg body  
 51 weight ethanol (EtOH) via gavage. Note that one EtOH litter was excluded from further experiments given the litter size was 7 (mean, range for  
 52 other litters: 15, 11-19). \* A separate cohort of offspring from these litters were also examined for metabolic outcomes (reported in Nguyen et al.

53 2019). <sup>^</sup>  $n=5$  at PN3 due to aging error for 1 litter. <sup>^^</sup> Estradiol measured in a separate group of females to those used for estrous cycles etc. E,  
54 embryonic day; E2, estradiol; F, female; P4, progesterone; PN, postnatal day; qPCR, quantitative real-time polymerase chain reaction.

55 **Figure 2**

56

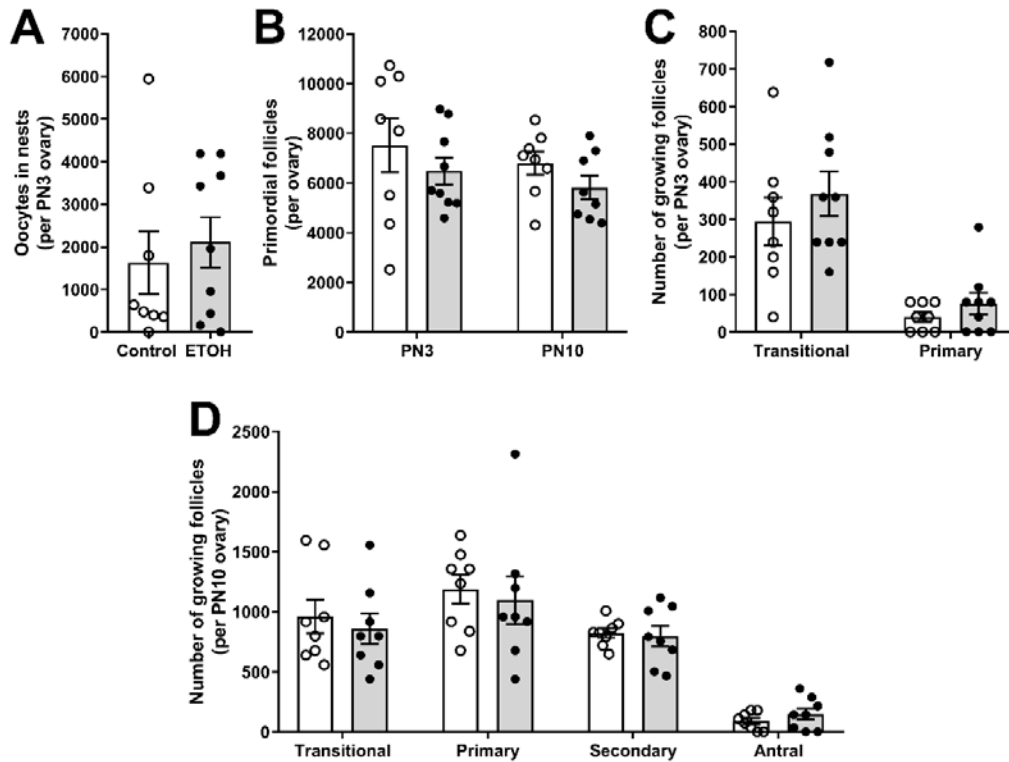

57 **Figure 2 Moderate, acute prenatal alcohol exposure did not alter ovarian oocyte or**  
58 **follicle numbers in neonatal rat offspring.** Pregnant dams were treated with ethanol (EtOH,  
59 1 g/kg body weight) or saline (control) at embryonic day (E) 13.5 and 14.5. (A) Oocyte  
60 numbers within ovarian cysts or nests prior to follicle formation in postnatal day (PN) 3  
61 ovaries. (B) Non-growing primordial follicles (ovarian reserve) in PN3 and PN10 ovaries. (C)  
62 Early growing follicles (transitional or primary) in PN3 ovaries. (D) Growing follicles  
63 (transitional, primary, secondary and antral) in PN10 ovaries. All data are presented as mean  
64  $\pm$  SEM. Open bars/circles indicate control offspring ( $n = 8$  from 6 litters at both ages); grey  
65 bars/solid circles indicate EtOH offspring ( $n = 9$  from 6 litters at PN3;  $n = 8$  from 6 litters at  
66 PN10). Data were analysed using an unpaired t-test (parametric data) or non-parametric  
67 Mann-Whitney rank sum test to determine significant differences between groups for oocytes  
68 or each follicle type, with significance determined at  $P < 0.05$ .

69



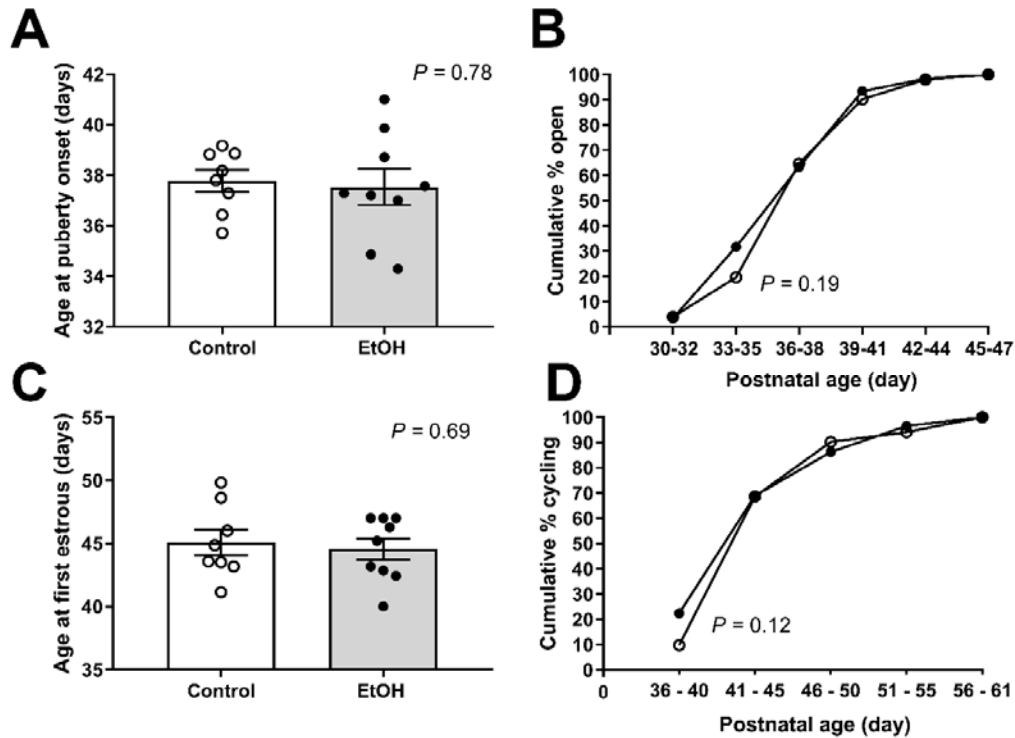

70 **Figure 3**

71 **Figure 3 Moderate, acute prenatal alcohol exposure did not alter puberty onset in**  
72 **adolescent female rat offspring.** Pregnant dams were treated with ethanol (EtOH, 1 g/kg  
73 body weight) or saline (control) at embryonic day (E) 13.5 and 14.5. (A) Age at puberty onset  
74 (as defined by vaginal opening). (B) Cumulative percentage of female offspring exhibiting  
75 puberty onset with increasing age. (C) Age at first estrous, as determined by vaginal electrical  
76 impedance >4kΩ. (D) Cumulative percentage of female offspring with estrous cycles with  
77 increasing age. For A) and C), open bars/circles indicate control offspring (litter averages  
78 from n = 8 litters; 5-7 females per litter); grey bars/solid circles indicate EtOH offspring  
79 (litter averages from n = 9 litters); all data are presented as mean ± SEM. Data analysed using  
80 unpaired t-tests. For B) and D), open circles indicate control offspring; solid circles indicate  
81 EtOH offspring; all data shown as % of all offspring across litters (number of litters as for A)  
82 and B)). Data compared at postnatal (PN) 33-35 in B) and at PN36-40 in D) using Fisher's  
83 Exact test. Significance for all tests was set at  $P < 0.05$ .

84

85

86

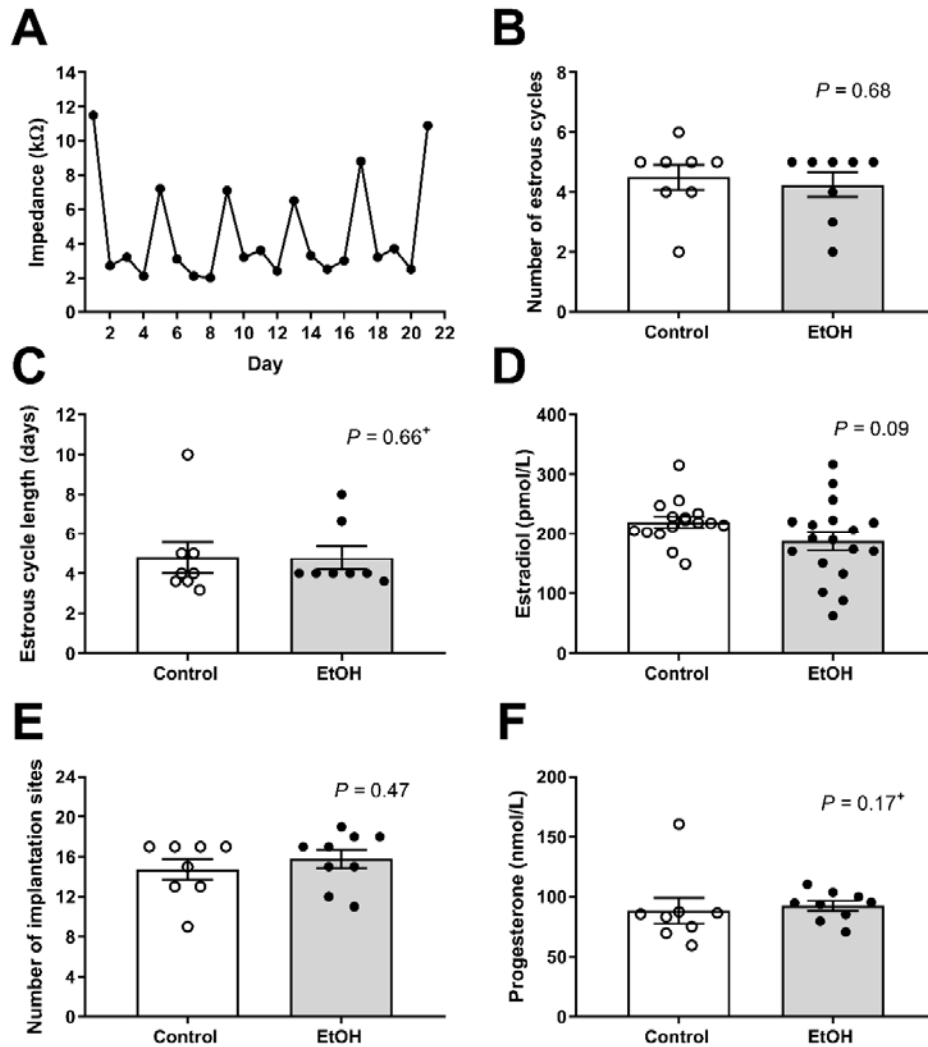

87 **Figure 4**

88 **Figure 4 Moderate, acute prenatal alcohol exposure did not alter reproductive outcomes**

89 **in adult female rat offspring.** Pregnant dams were treated with ethanol (EtOH, 1 g/kg body

90 weight) or saline (control) at embryonic day (E) 13.5 and 14.5. (A) An example of vaginal

91 impedance readings over a 21-day monitoring period, indicating regular estrous cycles. Peaks

92 >4kΩ indicate estrus. (B) Number of estrous cycles measured over the 21-day monitoring

93 period. (C) Average length of estrous cycles (per female) measured over the 21-day

94 monitoring period. For B) and C), n = 8 per group (1 female from each litter). (D) Plasma

95 estradiol in 6-month old female offspring during estrus (vaginal impedance >4kΩ); n = 16

96 (control) or 18 (EtOH) per group (2 females from each litter). E) Number of implantation

97 sites per mated female offspring at embryonic day (E) 9-11. (F) Plasma progesterone levels

98 of mated female offspring at E9-11. For E) to F), n = 8 (control) or 9 (EtOH) per group (1

99 female from each litter). For B) - F), open bars/circles indicate control offspring; grey

100 bars/solid circles indicate EtOH offspring; all data are presented as mean ± SEM. Data were

101 analysed using an unpaired t-test (parametric data) or non-parametric Mann-Whitney rank

102 sum test (indicated by †) to determine significant differences between groups, with  
103 significance determined at  $P < 0.05$ .
